# Supplementary material for: New glycopolymers as multivalent systems for lectin recognition
Source: Royal Society of Chemistry journal article supplement (doi:10.1039/c4md00097h), 2014-01-01
Supplement: c4md00097h1.pdf [file c4md00097h1.pdf]

## New glycopolymers as multivalent systems for lectin recognition

Michele Fiore,<sup>a</sup> Nathalie Berthet, Olivier Renaudet<sup>a,b</sup> and Valessa Barbier<sup>a,c</sup>

### Table Of Contents

|                                                                                                                                                                                                                          |   |
|--------------------------------------------------------------------------------------------------------------------------------------------------------------------------------------------------------------------------|---|
| Figure S1. <sup>1</sup> H NMR spectrum of 1p in CDCl <sub>3</sub> , 400MHz.....                                                                                                                                          | 2 |
| Figure S2. IR spectrum of 1p .....                                                                                                                                                                                       | 2 |
| Figure S3. <sup>1</sup> H NMR spectrum of 1 in CDCl <sub>3</sub> , 400MHz.....                                                                                                                                           | 3 |
| Figure S4. IR spectrum of 1.....                                                                                                                                                                                         | 3 |
| Figure S5. ElectroSpray Ionization (ESI) analysis of 1 .....                                                                                                                                                             | 4 |
| Figure S6. ESI analysis of 2-Glc (reaction medium) .....                                                                                                                                                                 | 4 |
| Figure S7. ESI analysis of 2-GlcNAc (reaction medium).....                                                                                                                                                               | 5 |
| Figure S8. <sup>13</sup> C NMR spectrum of P1 in CD <sub>3</sub> COCD <sub>3</sub> , 400MHz .....                                                                                                                        | 5 |
| Figure S9. MALDI spectrum of P1 (Dithranol/sodium acetate).....                                                                                                                                                          | 6 |
| Figure S10. IR spectrum of P1 .....                                                                                                                                                                                      | 6 |
| Figure S11. Size Exclusion Analysis (SEC) of P1 in THF: dotted line, RI signal and full line, LS signal .....                                                                                                            | 7 |
| Figure S12. <sup>1</sup> H NMR spectrum of P1-GlcNAc in MeOD, 400MHz .....                                                                                                                                               | 7 |
| Figure S13. COSY NMR spectrum of P2-Glc in D <sub>2</sub> O.....                                                                                                                                                         | 8 |
| Figure S14. COSY NMR spectrum of P1-Glc in D <sub>2</sub> O.....                                                                                                                                                         | 8 |
| Figure S15. Plot of the absorbance signal (OD) at 490 nm of the Con A peroxidase reaction on the OPD substrate in presence of two fold serial dilutions of P1-Glc (■) or P2-Glc (●) coated on the microtitre plate. .... | 9 |

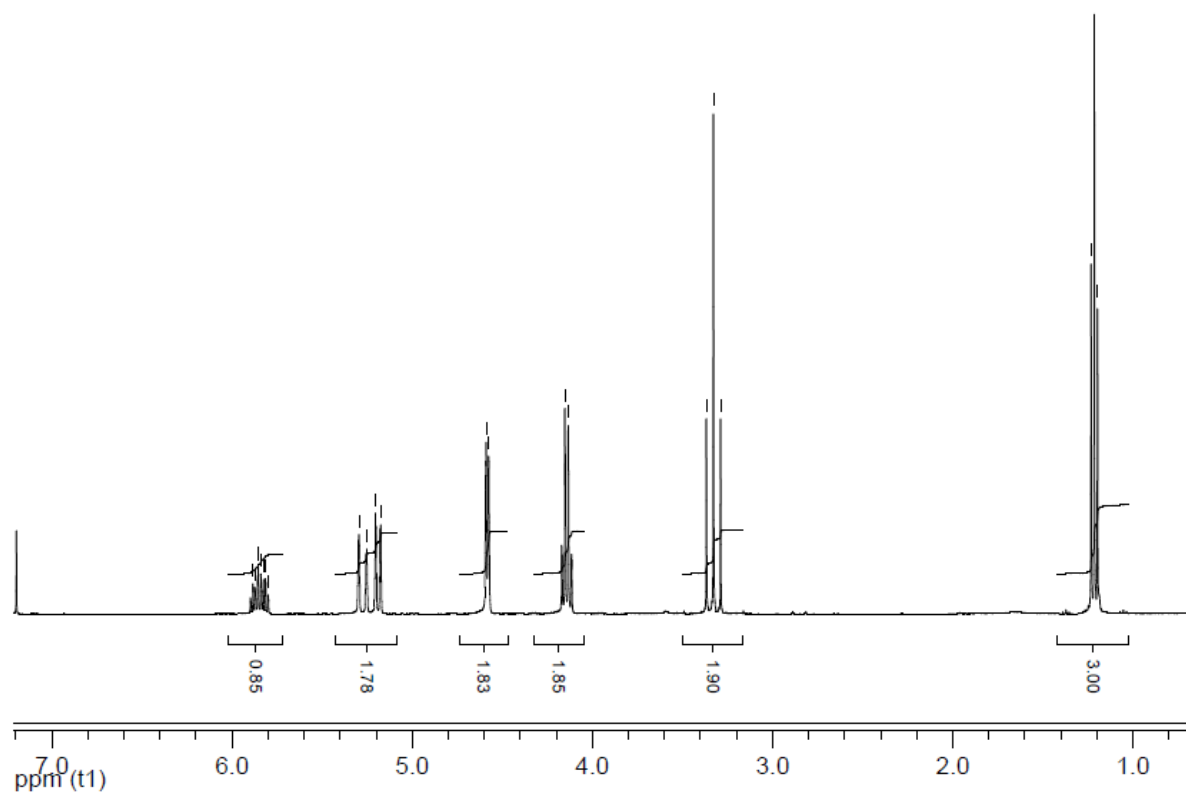

**Figure S1.** <sup>1</sup>H NMR spectrum of **1p** in CDCl<sub>3</sub>, 400MHz

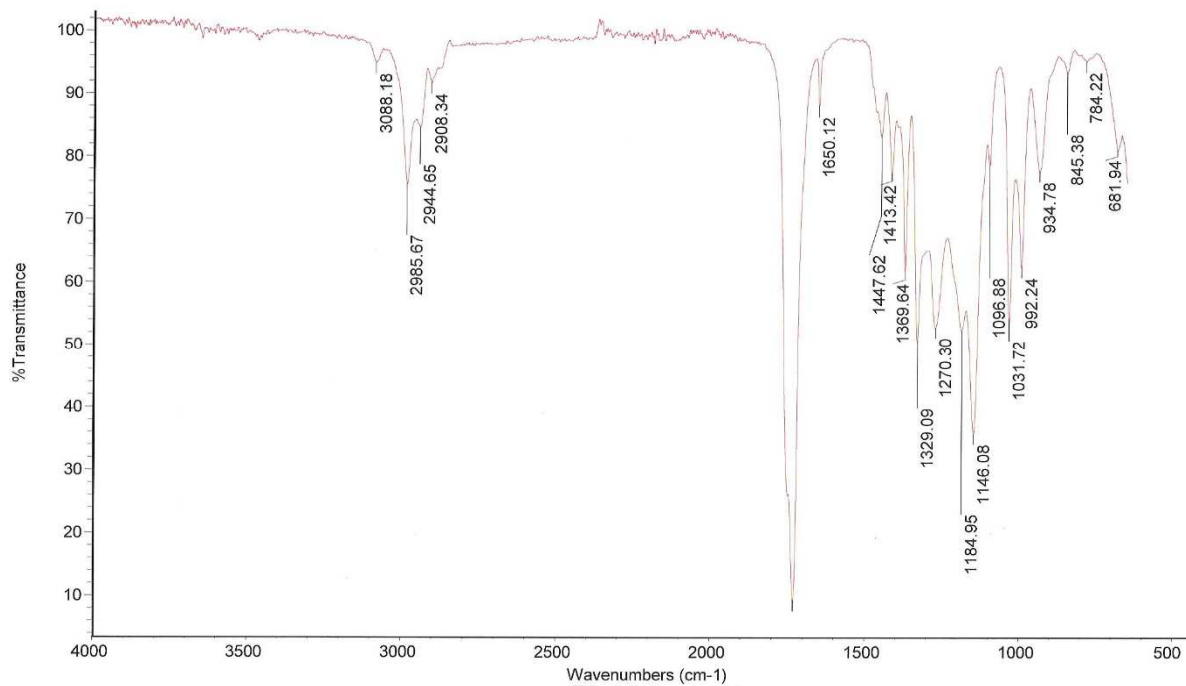

**Figure S2.** IR spectrum of **1p**

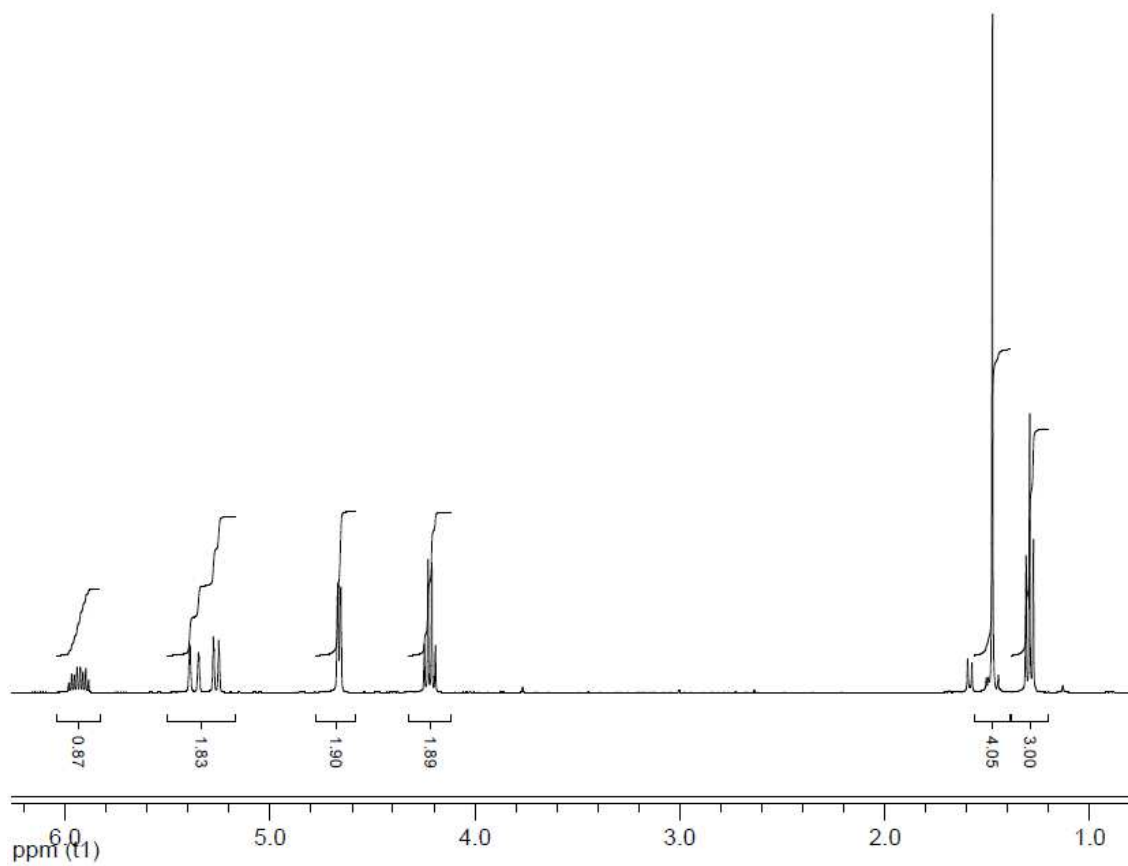

**Figure S3.**  $^1\text{H}$  NMR spectrum of **1** in  $\text{CDCl}_3$ , 400MHz

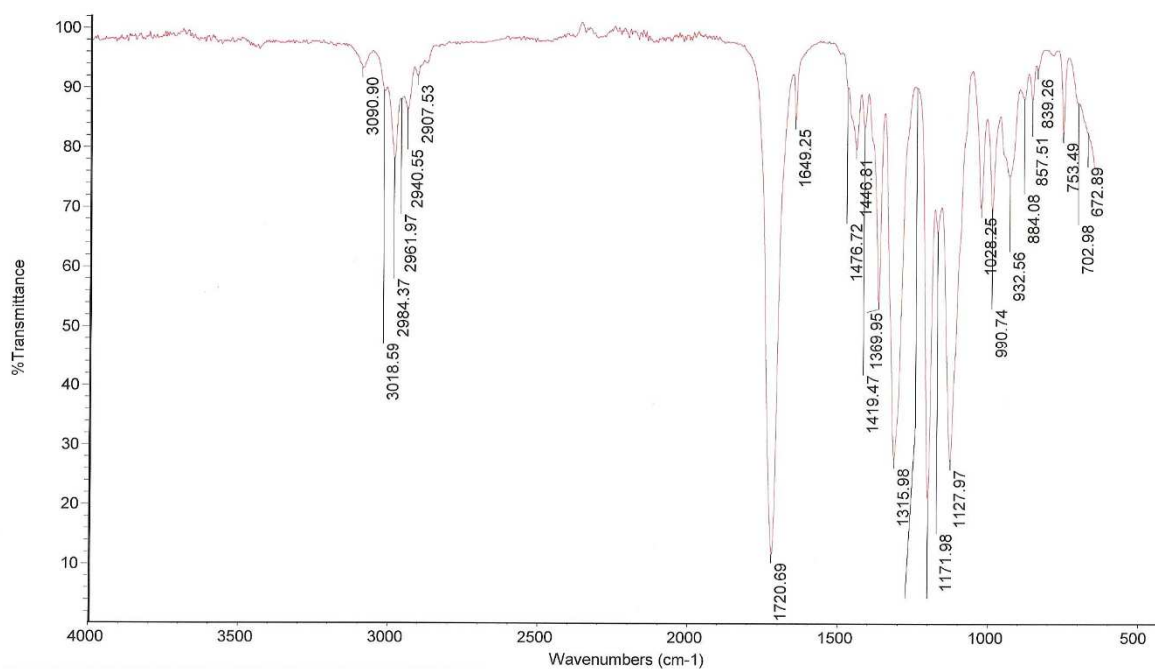

**Figure S4.** IR spectrum of **1**

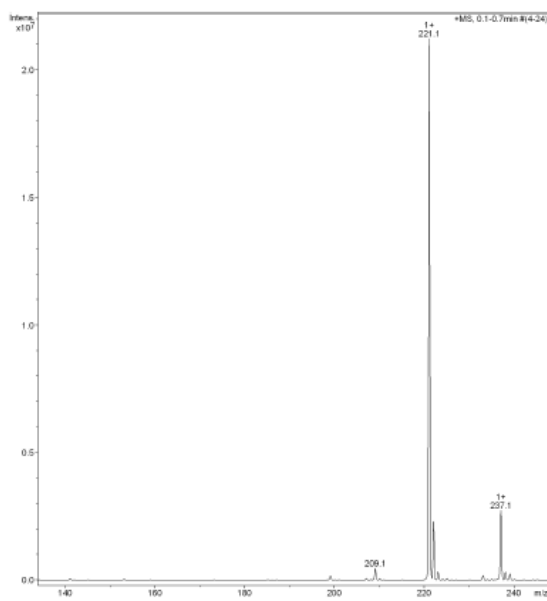

**Figure S5.** ElectroSpray Ionization (ESI) analysis of **1**

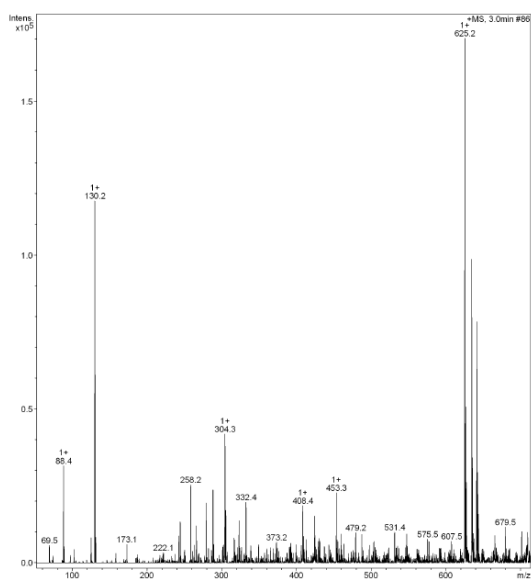

**Figure S6.** ESI analysis of **2-Glc** (reaction medium)

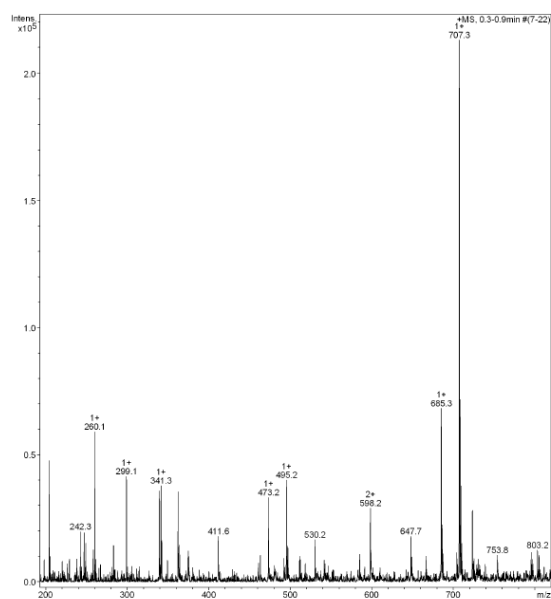

**Figure S7.** ESI analysis of **2-GlcNAc** (reaction medium)

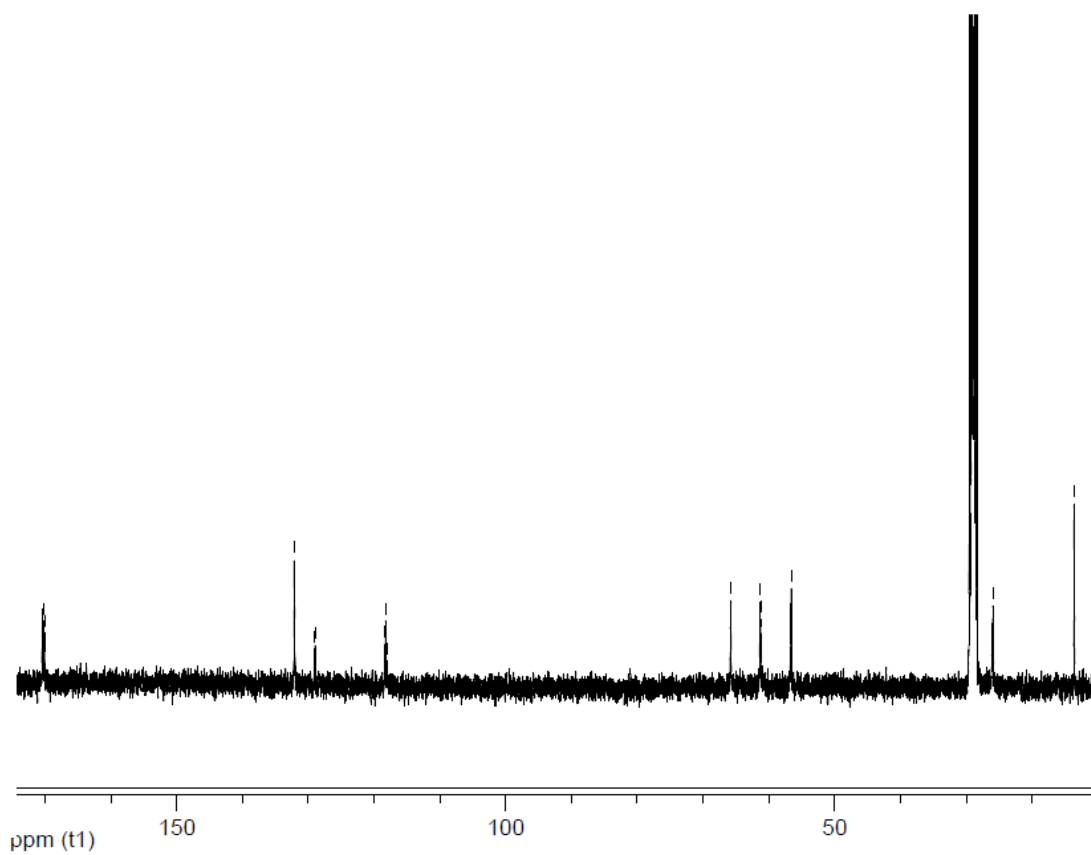

**Figure S8.**  $^{13}\text{C}$  NMR spectrum of **P1** in  $\text{CD}_3\text{COCD}_3$ , 400MHz

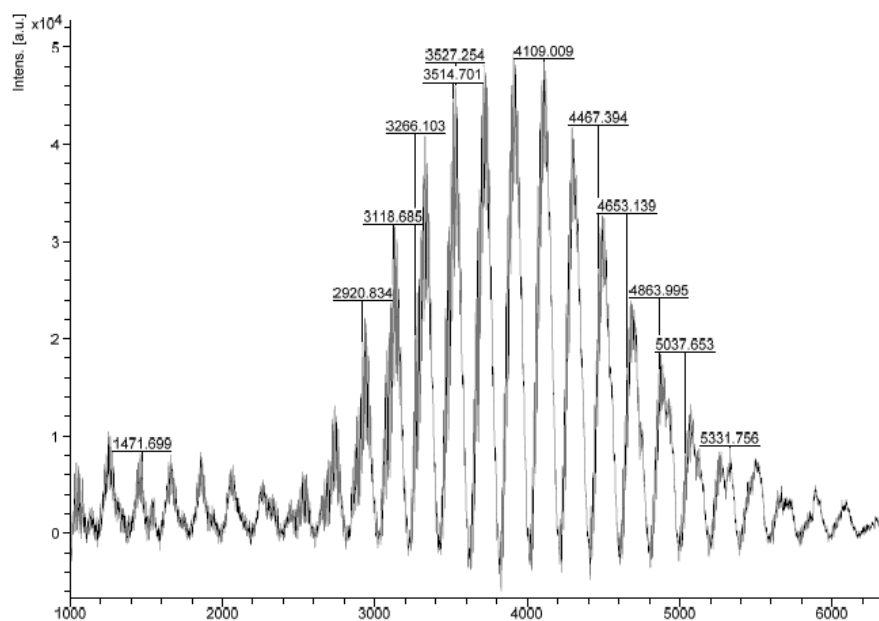

**Figure S9.** MALDI spectrum of P1 (Dithranol/sodium acetate)

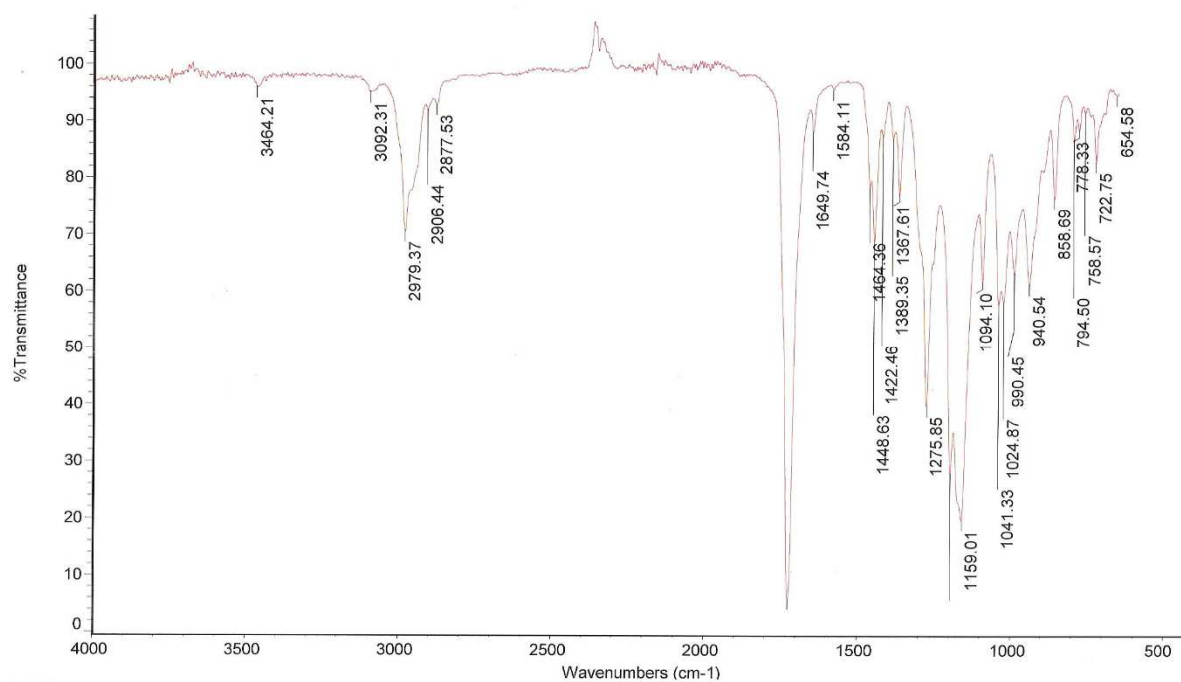

**Figure S10.** IR spectrum of P1

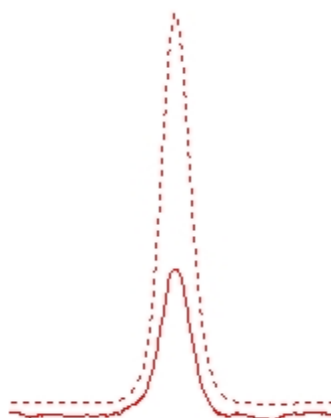

**Figure S11.** Size Exclusion Analysis (SEC) of **P1** in THF: dotted line, RI signal and full line, LS signal

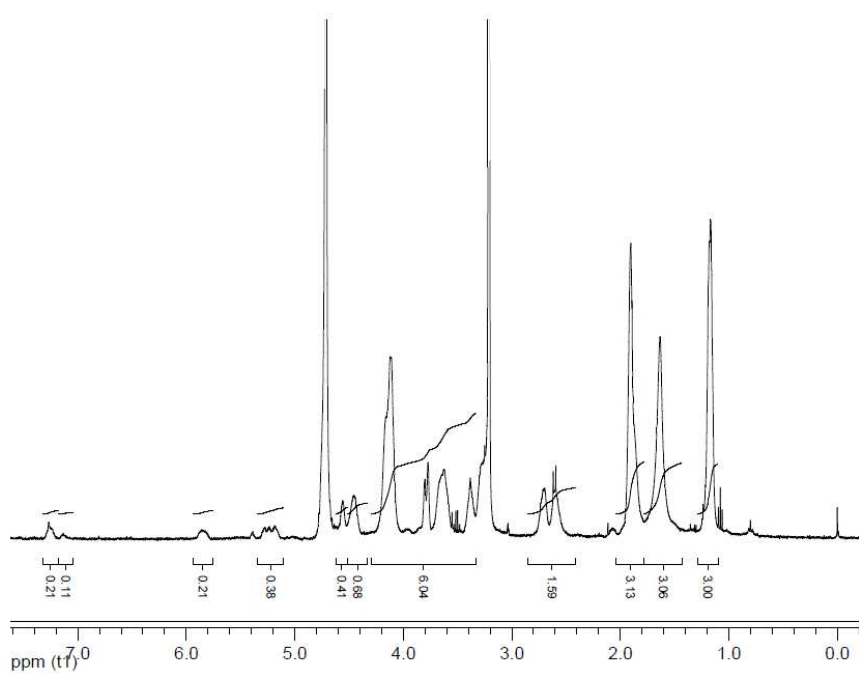

**Figure S12.** <sup>1</sup>H NMR spectrum of **P1-GlcNAc** in MeOD, 400MHz

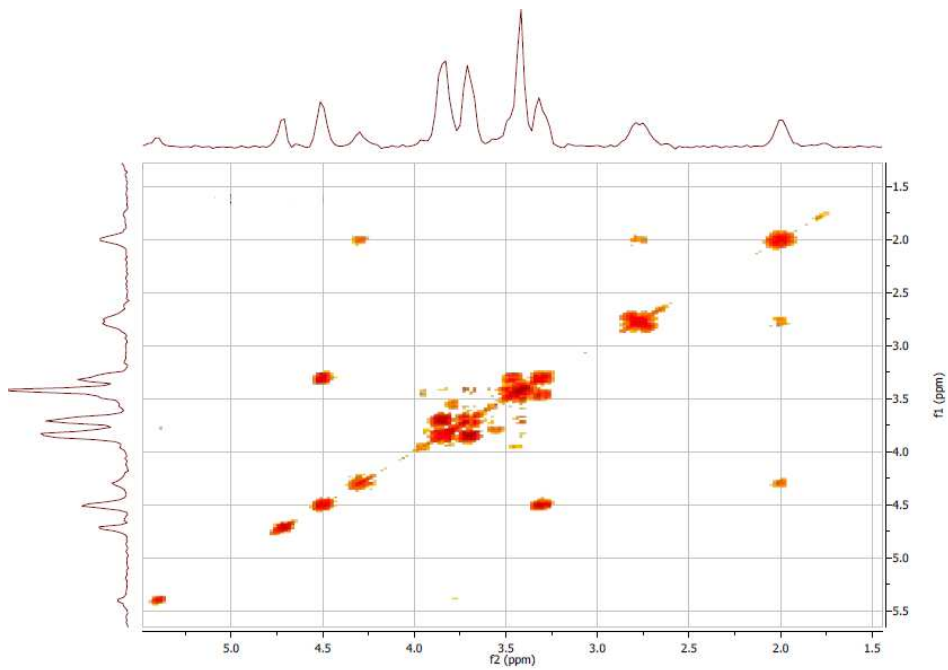

**Figure S13.** COSY NMR spectrum of **P2-Glc** in D<sub>2</sub>O

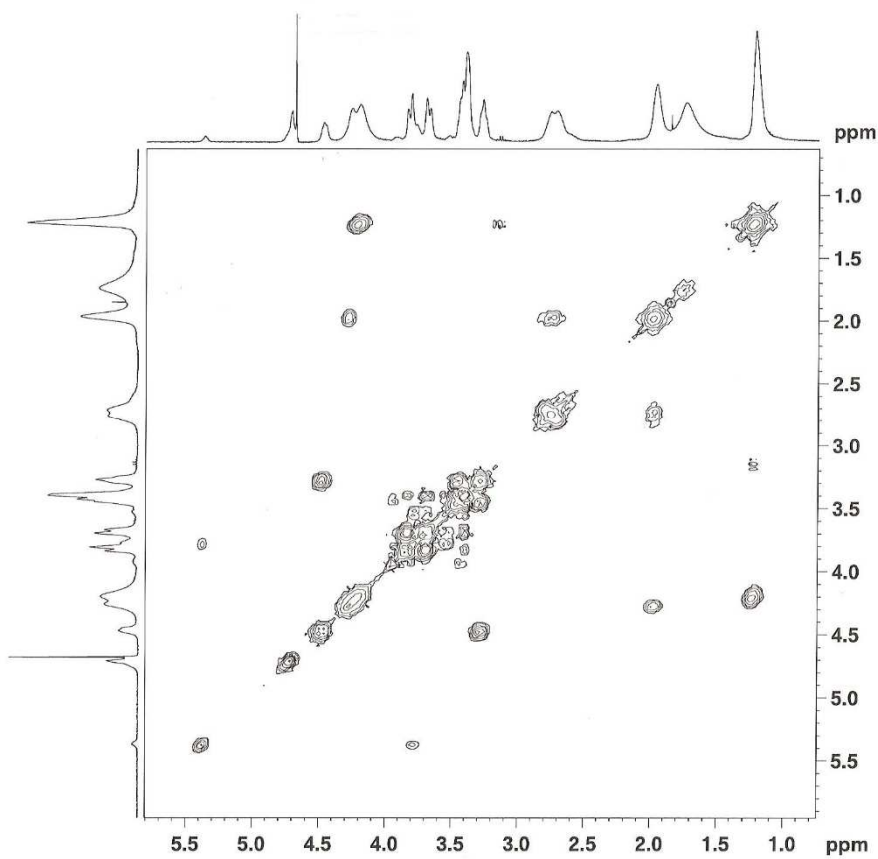

**Figure S14.** COSY NMR spectrum of **P1-Glc** in D<sub>2</sub>O



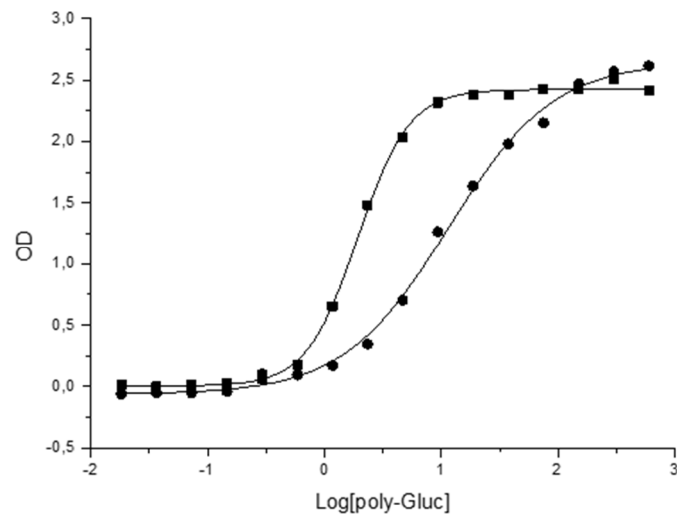

**Figure S15.** Plot of the absorbance signal (OD) at 490 nm of the Con A peroxidase reaction on the OPD substrate in presence of two fold serial dilutions of P1-Glc (■) or P2-Glc (●) coated on the microtitre plate.
